# Supplementary material for: The Cholesterol Transport Inhibitor U18666A Interferes with Pseudorabies Virus Infection
Source: MDPI journal article supplement (doi:10.3390/v14071539), 2022-07-14

# **The Cholesterol Transport Inhibitor U18666A Interferes with Pseudorabies Virus Infection**

Byeongwoon Song<sup>1, 2, \*</sup>

<sup>1</sup>Department of Microbiology, Immunology, and Physiology, Meharry Medical College,  
1023 21st Avenue North, Nashville, TN 37208, USA

<sup>2</sup>Center for AIDS Health Disparities Research, Meharry Medical College, 1023 21st  
Avenue North, Nashville, TN 37208, USA

\*Correspondence: Department of Microbiology, Immunology, and Physiology, Meharry  
Medical College, 1023 21st Avenue North, Nashville, TN 37208, USA;  
bsong@mmc.edu; Tel. (615) 327-6698; Fax. (615) 327-6021

**Figure S1. A full image of WES protein analysis.**

The cropped areas presented in Figure 5 are highlighted in red.

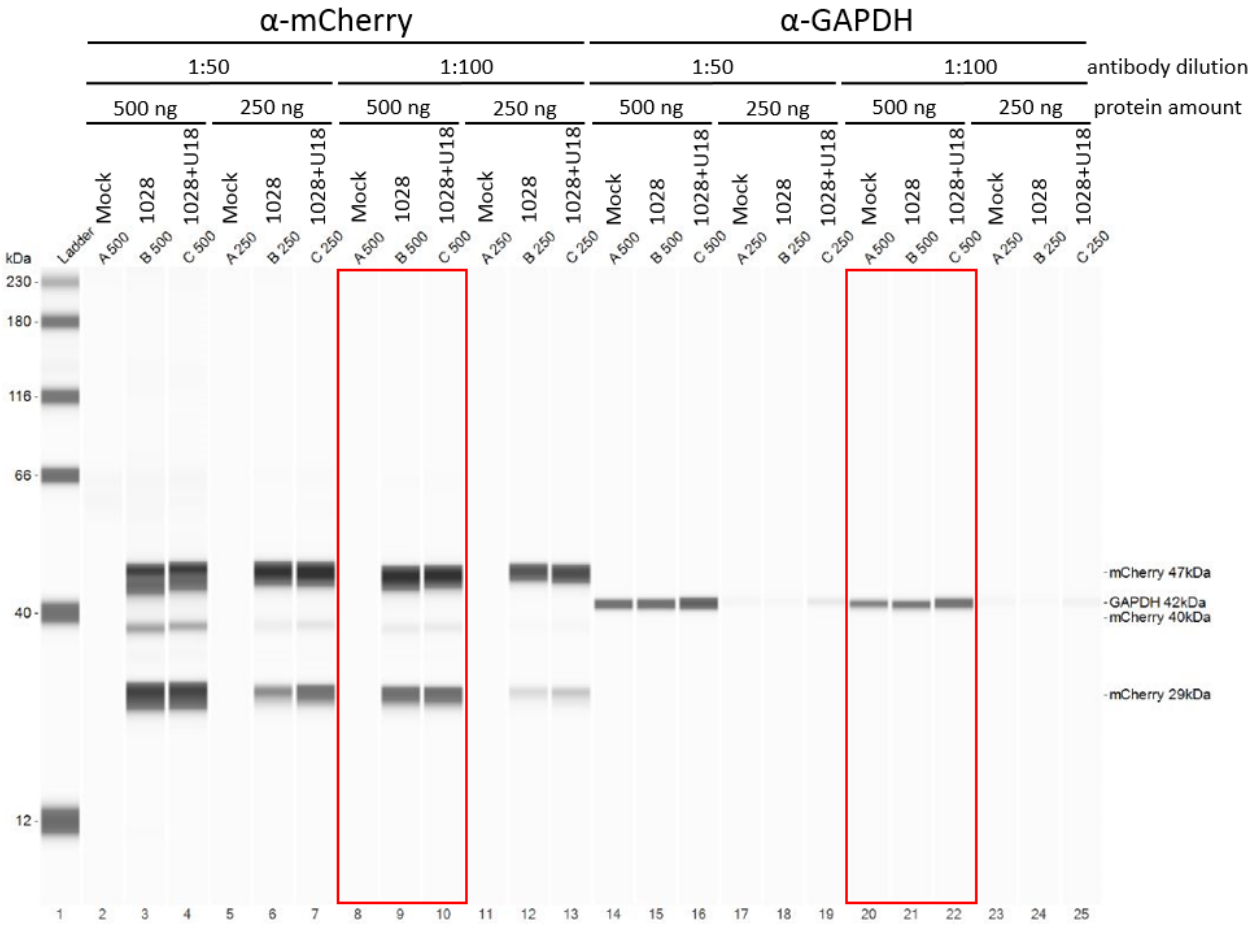

Supplement: s1 [file s1]
